# Supplementary material for: Optimization of the proliferation and persistency of CAR T cells derived from human induced pluripotent stem cells
Source: PubMed Central journal article supplement (PMC9870784; doi:10.1038/s41551-022-00969-0), 2022-12-12
Supplement: 41551_2022_969_MOESM1_ESM.pdf [file 41551_2022_969_MOESM1_ESM.pdf]

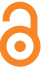

---

# Optimization of the proliferation and persistency of CAR T cells derived from human induced pluripotent stem cells

---

In the format provided by the authors and unedited

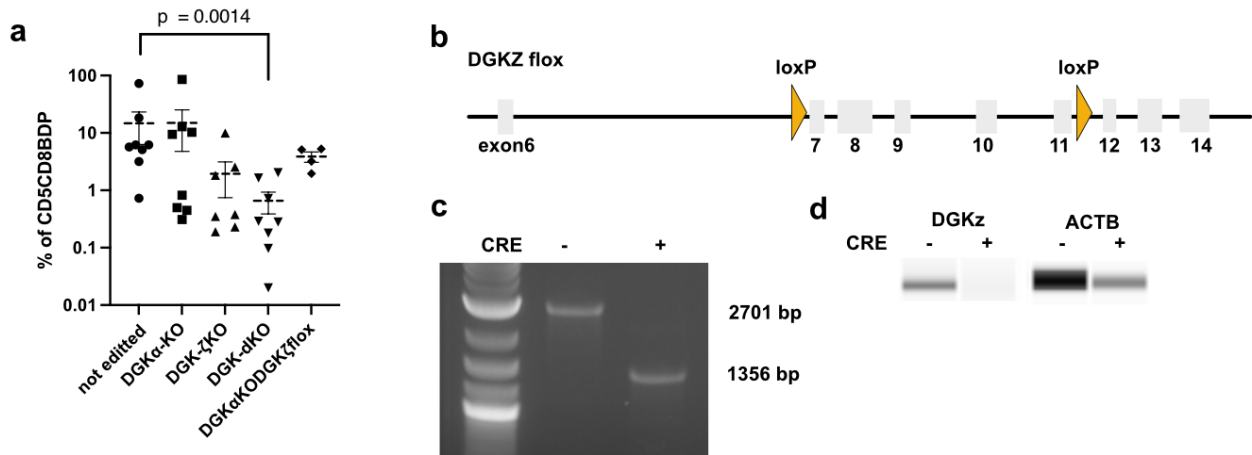

**Supplementary Fig. 1 | The strategy to produce DGK-dKO-iCAR-T<sub>CTL</sub> efficiently using DGK $\alpha$ <sup>-/-</sup>-DGK $\zeta$ <sup>f/f</sup> iPSCs**

**a.** Ratio of CD5CD8 $\beta$  DP cells to live differentiated cells derived from wild-type iCAR, DGK $\alpha$ -KO iCAR, DGK $\zeta$ -KO iCAR, DGK-dKO iCAR, and DGK $\alpha$ <sup>-/-</sup>-DGK $\zeta$ <sup>f/f</sup> CAR-iPSCs (n=4-8 mean  $\pm$  SEM). One-way ANOVA with Tukey's multiple comparisons test. **b.** Scheme of the DGK floxed sequence. To create DGK-dKO-iCAR-T<sub>CTL</sub> loxP sequence was inserted between exon 6 and exon 7 and exon 11 and exon 12. **c.** DGKz floxed iPSCs were differentiated into T cells. Differentiated T cells were transduced with CRE with the retrovirus. The DNA of CRE-transduced iCAR-T<sub>CTL</sub> derived from DGK $\alpha$ <sup>-/-</sup>-DGK $\zeta$ <sup>f/f</sup> iPSCs was extracted and the sequence including the floxed region was amplified to confirm the deletion. **d.** Protein was extracted from both CRE transduced and non-transduced iCAR-T<sub>CTL</sub> derived from DGK $\alpha$ <sup>-/-</sup>-DGK $\zeta$ <sup>f/f</sup> iPSCs and evaluated for the disruption of DGKz by western blotting.

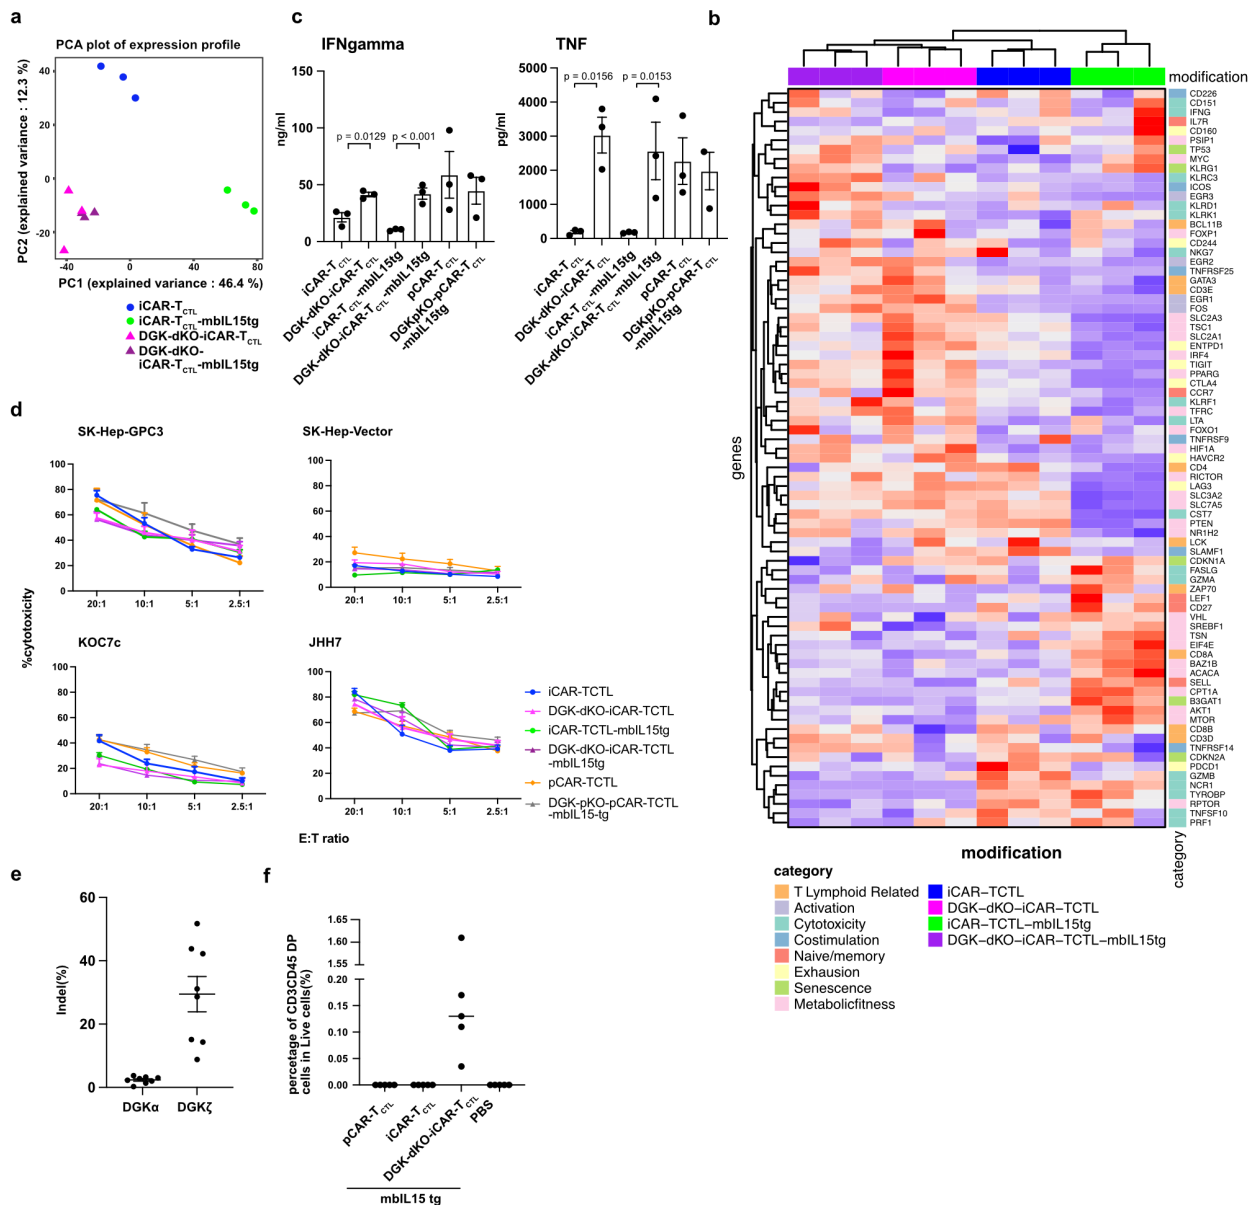

### Supplementary Fig. 2 | Combinatorial signal-enhanced iCAR-T<sub>CTL</sub> gene expression profile and anti-tumor function *in vitro*

**a.** A PCA of global transcriptional profiles of iCAR T cells (iCAR-T<sub>CTL</sub>, iCAR-T<sub>CTL</sub>-mbIL15tg, DGK-dKO-iCAR-T<sub>CTL</sub>, and DGK-dKO-iCAR-T<sub>CTL</sub>-mbIL15tg). **b.** Heat map of T lymphoid, activation, cytotoxicity, co-stimulation, naïve/memory, exhaustion, senescence- and metabolic fitness-related genes<sup>52,53,54</sup>. Shown are cpm values. **c.** Cytokine production of iCAR-T<sub>CTL</sub>, DGK-dKO-iCAR-T<sub>CTL</sub>, iCAR-T<sub>CTL</sub>-mbIL15tg, DGK-dKO-iCAR-T<sub>CTL</sub>-mbIL15tg pCAR-T<sub>CTL</sub>, and DGK-pKO-pCAR-T<sub>CTL</sub>-mbIL15tg 48 h after co-culturing with irradiated SK-Hep-GPC3 ( $n = 3$ , mean  $\pm$  SEM). One-way ANOVA with Tukey's multiple comparisons test. **d.** <sup>51</sup>Cr release assay of iCAR-T<sub>CTL</sub>, DGK-dKO-iCAR-T<sub>CTL</sub>, iCAR-T<sub>CTL</sub>-mbIL15tg, DGK-dKO-iCAR-T<sub>CTL</sub>-mbIL15tg, pCAR-T<sub>CTL</sub>, and DGK-pKO-pCAR-T<sub>CTL</sub>-mbIL15tg against GPC3 positive (SK-Hep-GPC3, Koc7c, and JHH7) or negative (SK-Hep-Vector) cancer cell lines ( $n=3$  mean  $\pm$  SEM). **e.** Knockout efficiency of DGK genes in primary T cells determined by tracking of indels by decomposition (TIDE) analysis ( $n = 8$  mean  $\pm$  SEM). **f.** Percentage of CD3<sup>+</sup>CD45<sup>DP</sup> human T cells in the peripheral blood cells of tumor-bearing mice 28 days after the treatment. Values were determined by flow cytometry ( $n = 5$  per cohort).

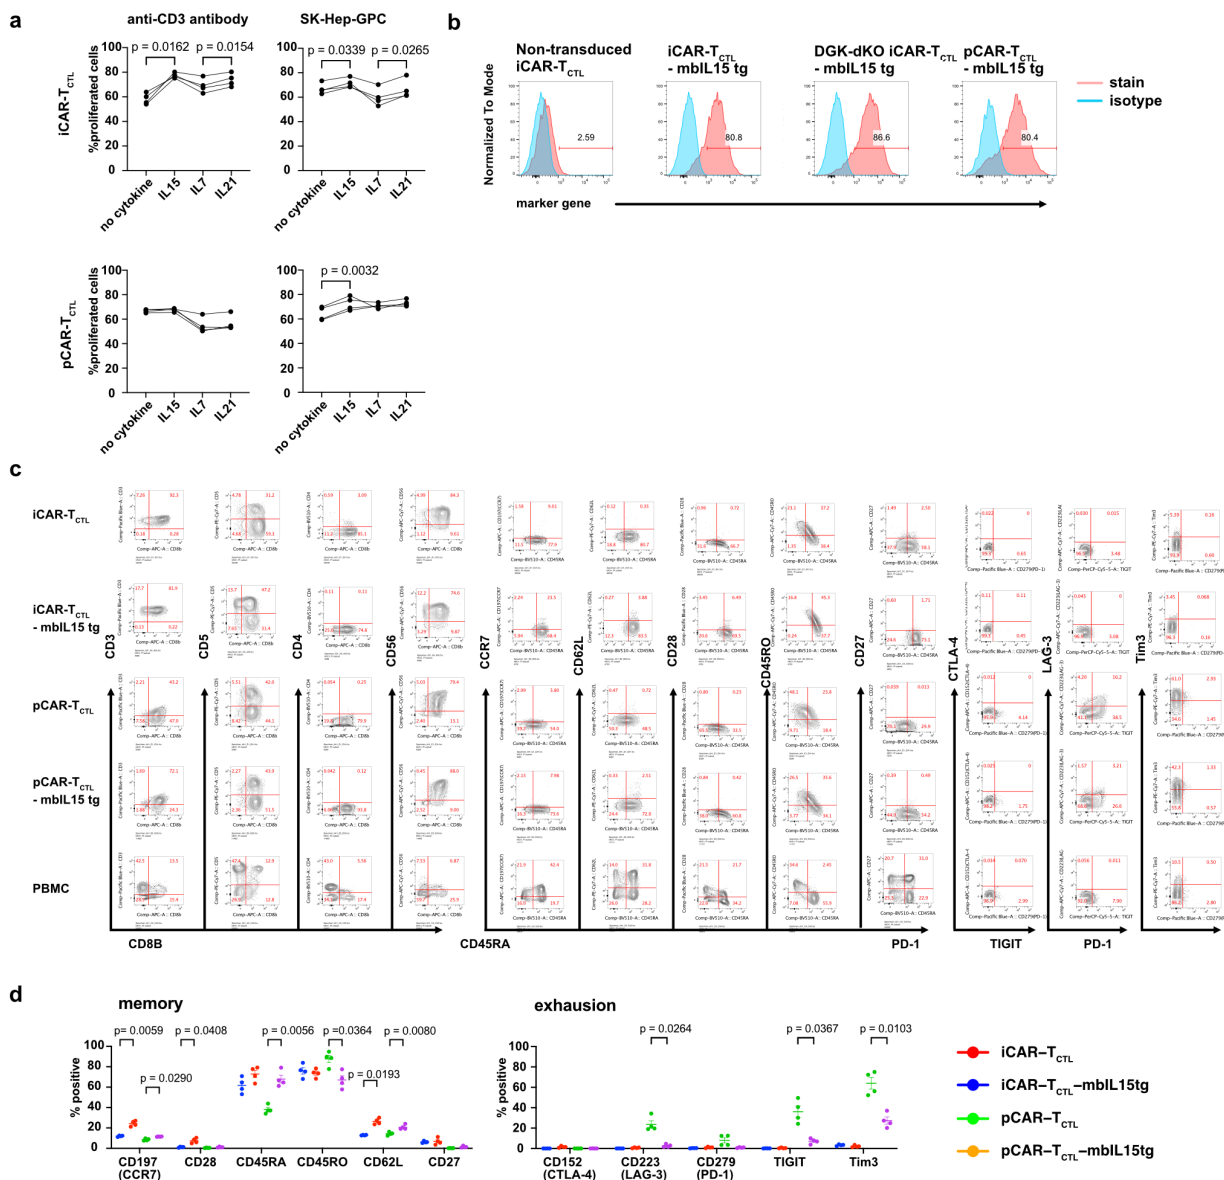

**Supplementary Fig. 3 | Signal 3 enhancement with mbL15 increased the memory marker expression and decreased the exhaustion marker expression**

**a.** Enhancement of proliferation capability of iCAR-T<sub>CTL</sub> or pCAR-T<sub>CTL</sub> with additional signal 3-related cytokines. Fluorescence-labeled iCAR-T<sub>CTL</sub> or pCAR-T<sub>CTL</sub> is stimulated with irradiated SK-Hep-GPC3. Each of indicated cytokines is added to the culture medium. One-way ANOVA with Tukey's multiple comparisons test. **b.** Expression of tNGFR in mbL15-transduced iCAR-T<sub>CTL</sub>, DGK-dKO-iCAR-T<sub>CTL</sub>, and pCAR-T<sub>CTL</sub>. **c-d.** Surface antigen profiles of iCAR-T<sub>CTL</sub>, iCAR-T<sub>CTL</sub>-mbL15tg, pCAR-T<sub>CTL</sub> and pCAR-T<sub>CTL</sub>-mbL15tg. iCAR-T<sub>CTL</sub>, iCAR-T<sub>CTL</sub>-mbL15tg, pCAR-T<sub>CTL</sub> and pCAR-T<sub>CTL</sub>-mbL15tg were evaluated using surface antigen expression related to naïve/memory, and exhaustion phenotype. One-way ANOVA with Tukey's multiple comparisons test.

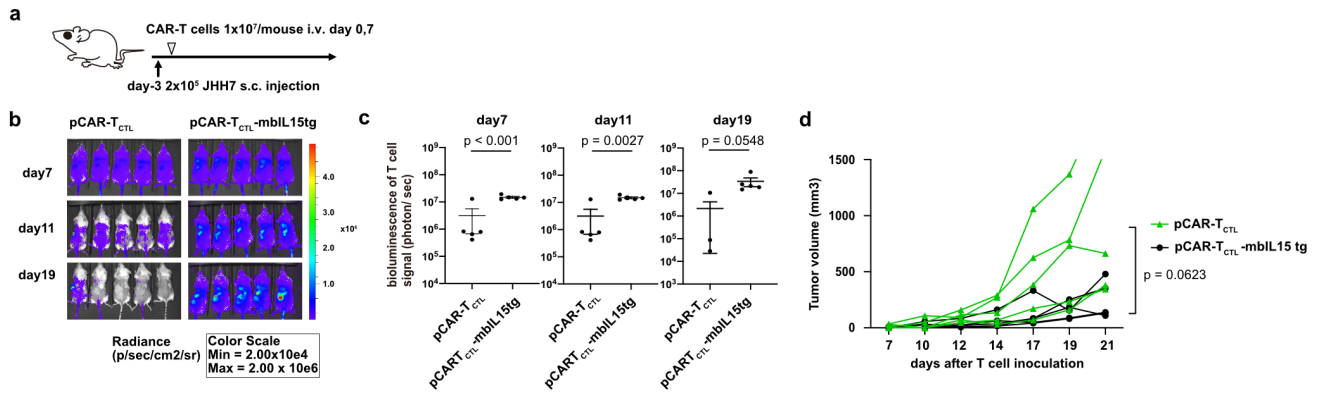

### Supplementary Fig. 4 | Signal enhancement improved the accumulation, persistency, and effector function of pCAR-T<sub>CTL</sub>

**a-d.** Treatment schedule of the liver cancer subcutaneous xenograft model (**a**). NSG mice were injected subcutaneously with  $2 \times 10^5$  JHH7 cells 3 days before the treatment. Three days after the liver cancer inoculation,  $1 \times 10^7$  pCAR-T<sub>CTL</sub> or pCAR-T<sub>CTL</sub>-mbIL15tg were administered intravenously ( $n = 5$  for each group, mean  $\pm$  SEM). *In vivo* bioluminescence imaging of injected T cells in NSG mice (**b**). Total flux (photons/s) of injected pCAR-T cells in the JHH7 tumor was quantified at the indicated time points (**c**). Student's *t*-test. Tumor volume of inoculated JHH7 at the indicated time points in individual mice treated with the indicated test cells. Mean tumor size  $\pm$  SEM ( $n = 5$  of each group). Two-way ANOVA (**d**).

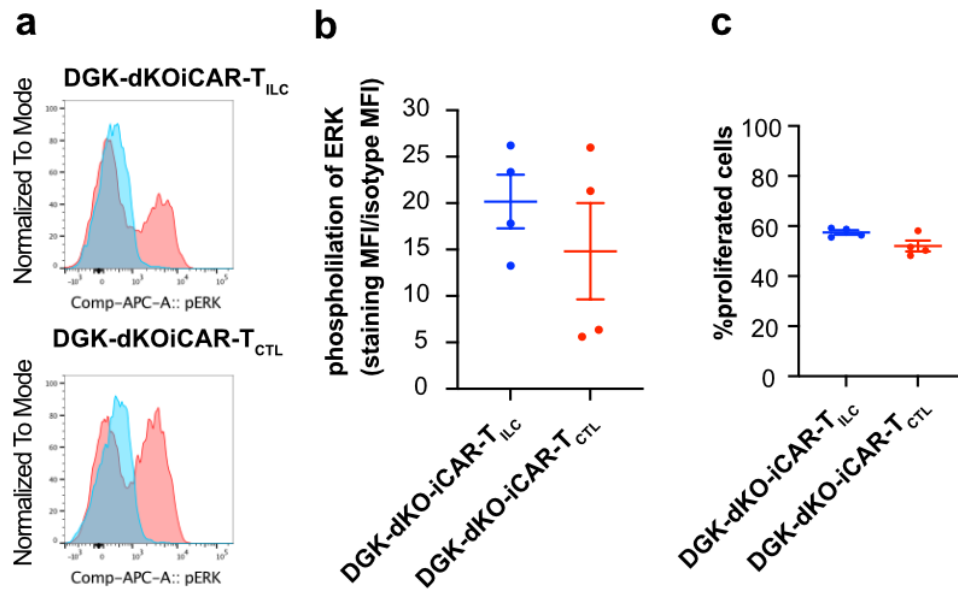

**Supplementary Fig.5 | DGK-dKO-iCAR-T<sub>ILC</sub> have comparable tumor suppressive function DGK-dKO-iCAR-T<sub>CTL</sub>**

**a-b** Detection of phosphorylated ERK (pERK) in DGKdKO-iCAR-T<sub>CTL</sub> and DGKdKO-iCAR-T<sub>ILC</sub> 60 min after co-culturing with irradiated SK-Hep-GPC3. (n=4 mean ± SEM). **c**. Proliferation assay of DGKdKO-iCAR-T<sub>CTL</sub> and DGKdKO-iCAR-T<sub>ILC</sub> n = 4, mean ± SEM. SEM, standard error of the mean (n=4 mean ± SEM).

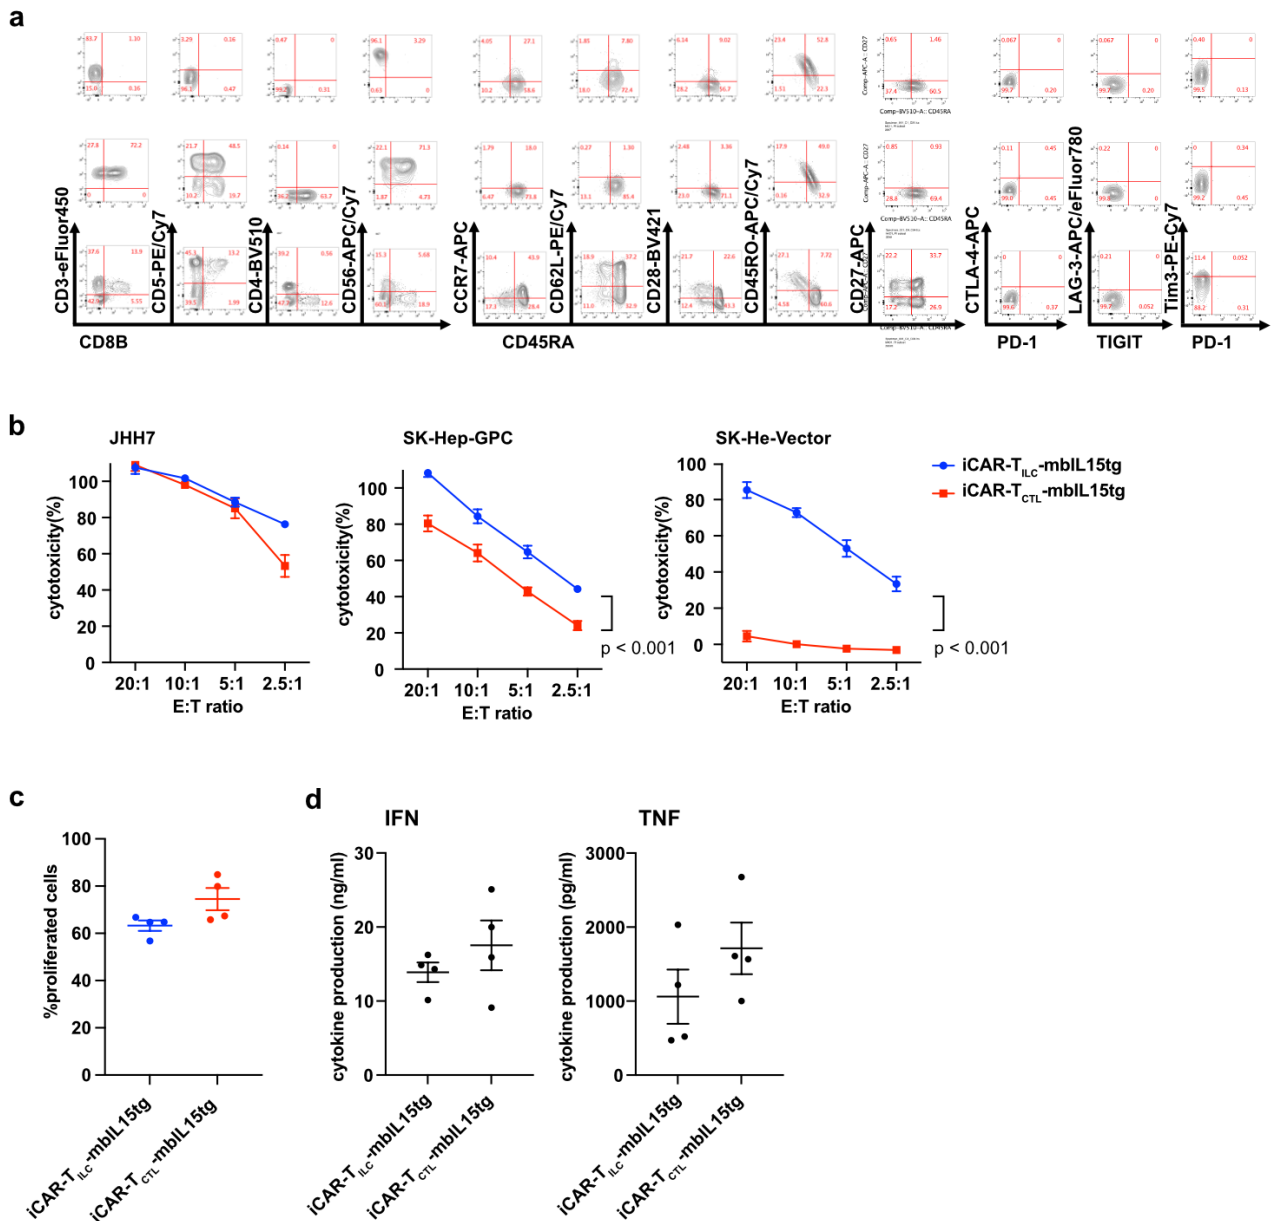

**Supplementary Fig. 6 | iCAR-T<sub>ILC</sub>-mbIL15tg have a comparable function to iCAR-T<sub>CTL</sub>-mbIL15tg *in vitro***

**a** Surface antigen profiles of dKO-iCAR-T<sub>CTL</sub>-mbIL15tg and iCAR-T<sub>ILC</sub>-mbIL15tg. dKO-iCAR-T<sub>CTL</sub>-mbIL15tg and iCAR-T<sub>ILC</sub>-mbIL15tg were evaluated using surface antigen expression related to T/NK lineage, naïve/memory, and exhaustion phenotype. **b.** *In vitro* cytotoxic assays of dKO-iCAR-T<sub>CTL</sub>-mbIL15tg and iCAR-T<sub>ILC</sub>-mbIL15tg against JHH7, SK-Hep-GPC3, and SK-Hep-Vector ( $n = 4$ , mean  $\pm$  SEM). Two-way ANOVA. **c.** Proliferation assay of dKO-iCAR-T<sub>CTL</sub>-mbIL15tg and iCAR-T<sub>ILC</sub>-mbIL15tg ( $n=4$  mean  $\pm$  SEM). **d.** Cytokine production dKO-iCAR-T<sub>CTL</sub>-mbIL15tg and iCAR-T<sub>ILC</sub>-mbIL15tg 48 h after coculturing with irradiated SK-Hep-GPC3 ( $n = 4$ ) ( $n=4$  mean  $\pm$  SEM).

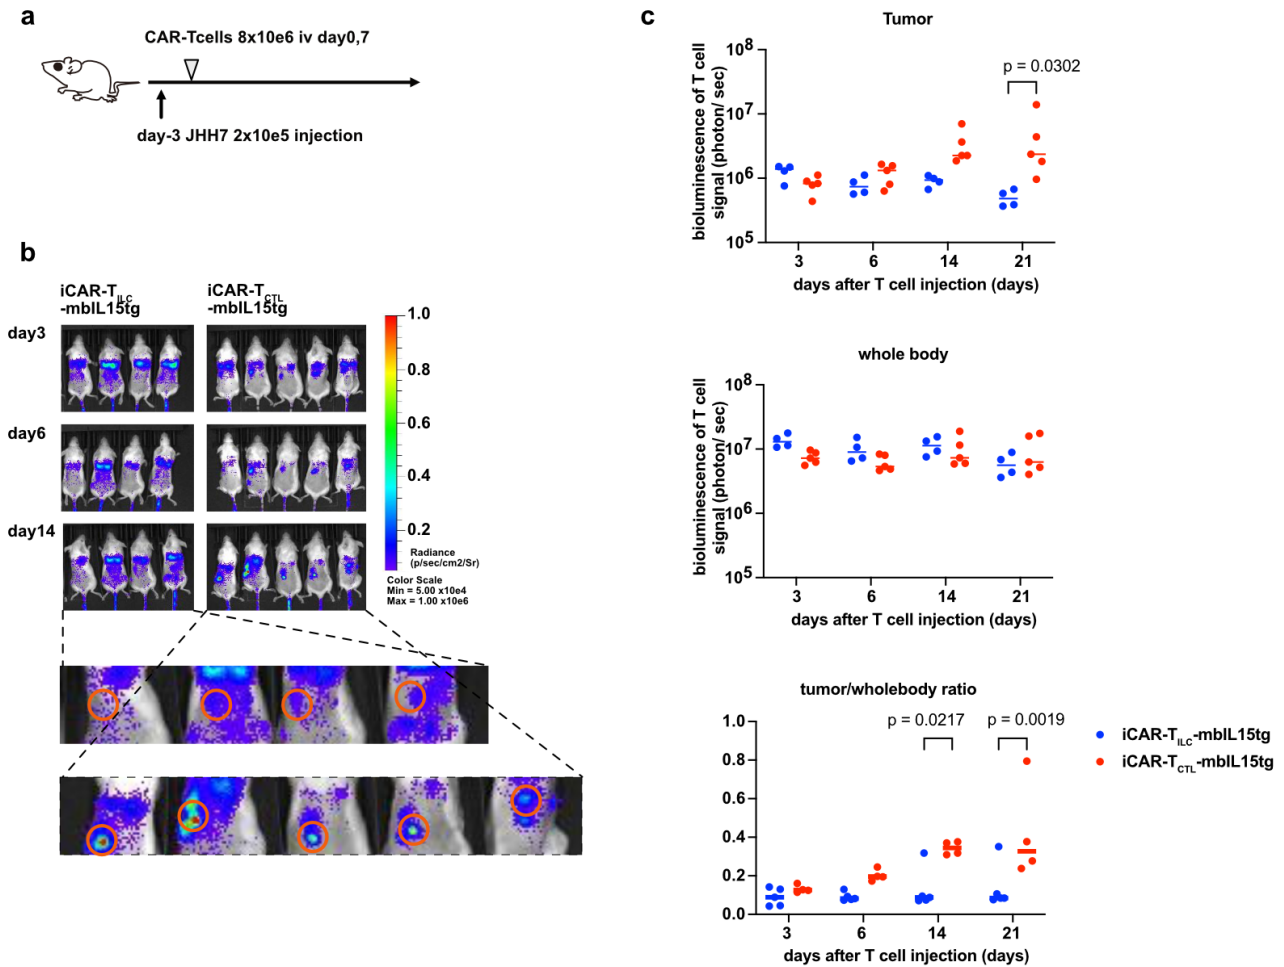

**Supplementary Fig. 7 | iCAR-T<sub>ILC</sub>-mbIL15tg showed different distribution *in vivo* from iCAR-T<sub>CTL</sub>-mbIL15tg**

**a-c.** NSG mice were injected subcutaneously with  $2 \times 10^5$  JHH7 cells 3 days before the treatment.  $8 \times 10^6$  dKO-iCAR-T<sub>CTL</sub>-mbIL15tg and iCAR-T<sub>ILC</sub>-mbIL15tg were injected intravenously on days 0 and 7 (**a**). *In vivo* bioluminescence imaging of the injected T cells in NSG mice (**b**). Total flux (photons/s) from the injected iCAR-T cells in the JHH7 tumor in the tumor (top panel), in the whole body (middle panel) was quantified at the indicated time points ( $n = 4-5$  of each group). Student's *t*-test. The bottom panel shows the ratio between tumor site/whole body of T cell signal ( $n = 4-5$  mean  $\pm$  SEM) (**c**).



**a**

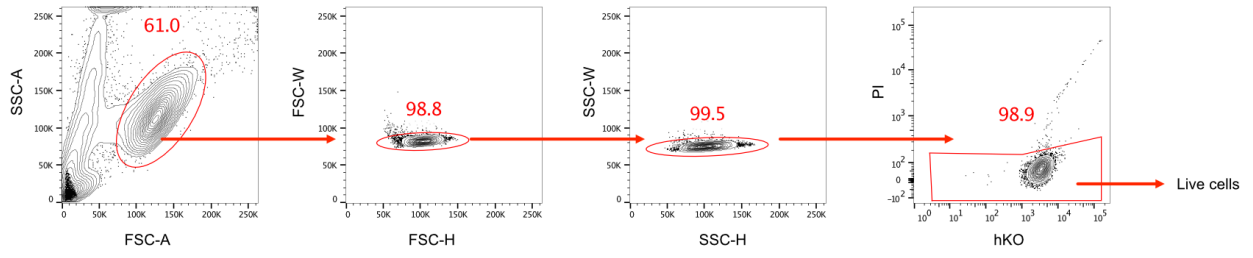

**Supplementary Fig. 8 | Flow-cytometry gating strategy.**  
**a.** Gating strategy applied to identify live cells.

**Supplementary Table 1 | List of genes for the single cell analysis (BD Bioscience Human T-Cell Expression Panel)**

| gene panel list |        |        |        |          |         |       |         |        |          |
|-----------------|--------|--------|--------|----------|---------|-------|---------|--------|----------|
| AIM2            | CCR2   | CD7    | DUSP2  | GZMA     | IL12RB1 | IL7R  | LAT2    | PTTG2  | TLR9     |
| ANXA5           | CCR3   | CD70   | DUSP4  | GZMB     | IL12RB2 | IL9   | LCK     | PYCR1  | TNF      |
| APOBEC3G        | CCR4   | CD8A   | EGR1   | GZMH     | IL13    | IL9R  | LEF1    | RORA   | TNFRSF18 |
| ARL4C           | CCR5   | CD8B   | EGR3   | GZMK     | IL15    | IRF4  | LGALS1  | RORC   | TNFRSF1B |
| AURKB           | CCR6   | CD9    | ENTPD1 | GZMM     | IL15RA  | IRF8  | LGALS3  | RUNX3  | TNFRSF25 |
| B3GAT1          | CCR7   | CHI3L2 | EOMES  | HAVCR2   | IL17A   | ITGA4 | LIF     | S1PR1  | TNFRSF4  |
| BAX             | CCR8   | CLC    | F5     | HLA-A    | IL17F   | ITGAE | LILRB4  | SELL   | TNFRSF8  |
| BCL11B          | CCR9   | CLEC2D | FAS    | HLA-C    | IL18    | ITGAL | LRRC32  | SELPLG | TNFRSF9  |
| BCL2            | CD160  | CNOT2  | FASLG  | HLA-DMA  | IL18R1  | ITGAM | LTA     | SEMA7A | TNFSF10  |
| BCL6            | CD2    | CSF2   | FBXO22 | HLA-DMB  | IL18RAP | ITGAX | LTB     | SLAMF1 | TOP2A    |
| BIN2            | CD244  | CSF3   | FOSB   | HLA-DPA1 | IL1R2   | ITGB2 | MKI67   | SPOCK2 | TRAC     |
| BTG1            | CD247  | CST7   | FOSL1  | HLA-DPB1 | IL2     | ITK   | MYC     | SPP1   | TRAT1    |
| BTLA            | CD27   | CTLA4  | FOXO1  | HLA-DQA1 | IL21    | JUN   | NAMPT   | STAT1  | TRBC2    |
| C10orf54        | CD274  | CTSW   | FOXO3  | HLA-DQB1 | IL22    | JUNB  | NCR3    | STAT3  | TRDC     |
| CASP3           | CD300A | CX3CR1 | FOXP1  | HLA-DRA  | IL23R   | KIT   | NINJ2   | STAT4  | TRIB2    |
| CBLB            | CD3D   | CXCL10 | FOXP3  | HLA-DRB3 | IL25    | KLRB1 | NGK7    | STAT5A | TSPAN32  |
| CCL1            | CD3E   | CXCL13 | FYB    | HMGB2    | IL2RA   | KLRC1 | NT5E    | STAT6  | TXK      |
| CCL2            | CD3G   | CXCL8  | FYN    | HMMR     | IL2RB   | KLRC3 | OAS1    | TARP   | TYMS     |
| CCL20           | CD4    | CXCL9  | GAPDH  | ICAM1    | IL3     | KLRC4 | PASK    | TBX21  | UBE2C    |
| CCL3            | CD40LG | CXCR1  | GATA3  | ICOS     | IL31    | KLRF1 | PDCD1   | TCF7   | VNN2     |
| CCL4            | CD44   | CXCR3  | GHR    | IER3     | IL32    | KLRG1 | PECAM1  | TGFB1  | XCL1     |
| CCL5            | CD48   | CXCR4  | GIMAP2 | IER5     | IL4     | KLRK1 | PIK3IP1 | TGFB3  | ZAP70    |
| CCNB1           | CD5    | CXCR5  | GIMAP5 | IFNG     | IL4R    | LAG3  | PMCH    | TIAF1  | ZBED2    |
| CCND2           | CD52   | CXCR6  | GIMAP7 | IFNGR1   | IL5     | LAIR2 | PRDM1   | TIGIT  | ZBTB16   |
| CCR1            | CD6    | DPP4   | GLG1   | IKZF2    | IL6     | LAP3  | PRF1    | TK1    | ZNF683   |
| CCR10           | CD69   | DUSP1  | GNLY   | IL12A    | IL6R    | LAT   | PTGDR2  | TLR2   |          |

**Supplementary Table 2 | GO analysis of DEGs in iCAR-T<sub>CTL</sub>-mbIL15tg versus iCAR-T<sub>CTL</sub> and DGK-dKO-iCAR-T<sub>CTL</sub> versus iCAR-T<sub>CTL</sub>**

| iCAR-TCTLmbIL15 vs iCAR-TCTL  |              |          |                |             |          |                  |
|-------------------------------|--------------|----------|----------------|-------------|----------|------------------|
| Description                   | up-regulated |          | down-regulated |             | combined |                  |
|                               | Count        | p-value  | Count          | p-value     | p-value  | adjusted p-value |
| DNA conformation change       | 75           | 4.49E-33 | 2              | 0.999999275 | 3.39E-31 | 4.70E-27         |
| DNA replication               | 69           | 7.67E-31 | 8              | 0.983544045 | 5.31E-29 | 2.56E-25         |
| chromosome organization       | 149          | 7.89E-31 | 28             | 0.99999985  | 5.54E-29 | 2.56E-25         |
| DNA metabolic process         | 134          | 3.00E-30 | 25             | 0.999995534 | 2.07E-28 | 7.17E-25         |
| DNA-dependent DNA replication | 51           | 1.50E-28 | 4              | 0.975827777 | 9.54E-27 | 2.65E-23         |
| cell cycle                    | 172          | 1.81E-25 | 60             | 0.999437821 | 1.05E-23 | 2.43E-20         |
| mitotic cell cycle            | 123          | 7.81E-25 | 33             | 0.998038453 | 4.40E-23 | 8.73E-20         |
| nucleosome assembly           | 41           | 6.90E-24 | 1              | 0.998995292 | 3.75E-22 | 6.50E-19         |
| DNA repair                    | 89           | 1.86E-23 | 11             | 0.999992476 | 9.95E-22 | 1.53E-18         |
| protein-DNA complex assembly  | 54           | 5.27E-23 | 2              | 0.999958876 | 2.76E-21 | 3.51E-18         |

| DGKdKO-iCAR-TCTL vs iCAR-TCTL                  |              |          |                |             |          |                  |
|------------------------------------------------|--------------|----------|----------------|-------------|----------|------------------|
| Description                                    | up-regulated |          | down-regulated |             | combined |                  |
|                                                | Count        | p-value  | Count          | p-value     | p-value  | adjusted p-value |
| regulation of multicellular organismal process | 61           | 2.85E-11 | 40             | 8.91E-05    | 8.80E-14 | 1.22E-09         |
| inflammatory response                          | 23           | 1.01E-08 | 18             | 1.28E-06    | 4.27E-13 | 2.96E-09         |
| locomotion                                     | 37           | 3.53E-08 | 29             | 5.06E-06    | 5.43E-12 | 2.51E-08         |
| cell migration                                 | 29           | 2.50E-06 | 26             | 2.51E-06    | 1.68E-10 | 4.77E-07         |
| regulation of cell proliferation               | 37           | 1.49E-08 | 24             | 0.00043007  | 1.72E-10 | 4.77E-07         |
| positive regulation of developmental process   | 33           | 1.06E-08 | 20             | 0.000970389 | 2.70E-10 | 6.10E-07         |
| cell motility                                  | 30           | 4.09E-06 | 27             | 3.41E-06    | 3.63E-10 | 6.10E-07         |
| localization of cell                           | 30           | 4.09E-06 | 27             | 3.41E-06    | 3.63E-10 | 6.10E-07         |
| regulation of response to external stimulus    | 24           | 3.75E-08 | 15             | 0.00044868  | 4.35E-10 | 6.10E-07         |
| cell communication                             | 84           | 3.47E-07 | 67             | 5.42E-05    | 4.83E-10 | 6.10E-07         |

adjusted p-value: Benjamini-Hochberg method

**Supplementary Table 3 | Schematic explanation of the effect of DGK-dKO and mblL15 transduction on iCAR-T<sub>CTL</sub>**

|                    | Cytokine Production | Proliferation | in vivo persistence |
|--------------------|---------------------|---------------|---------------------|
| DGK-dKO            | +                   | +             | +                   |
| mblL15tg           | no change           | +             | ++                  |
| DGK-dKO + mblL15tg | +                   | N/A           | +++                 |
